# Supplementary material
Source: PubMed Central journal article supplement (PMC5411613)
Supplement: JVI.00137-17_zjv999182585s1.pdf [file JVI.00137-17_zjv999182585s1.pdf]

1 **Figure S1. Ser5 genomic structure with RT-qPCR primer placement.**

2 Exons for the Ser5 gene are shown with alternating colors for each exon. Introns larger than ~2  
3 kb have been truncated for clarity (the sizes of the sequences not shown are given by a number  
4 flanked by ellipses [...]). Exons are shown in upper case and introns are shown in lower case  
5 through exon 12, but the sequences that follow show unique DNA as upper case and repetitive  
6 elements in lower case to emphasize the fact that exons 14 through 16 are part of SINE or LTR  
7 transposon repeats (see the Discussion for more information). Encoded amino acids are placed  
8 below the DNA sequence for the various exons, and stop codons for each exon are indicated by  
9 an asterisk (\*). The additional 9 nucleotides upstream of exon 15b are highlighted in purple to  
10 show the beginning of exon 15a. The italicized “*tg*” shown for isoform 008a does not match the  
11 canonical “AG” normally found for a U2 splice acceptor sequence, but these rare “*tg*” acceptors  
12 have been reported to produce spliced products (Szafranski et al., 2007) and the fact that a full  
13 length clone was isolated for this isoform (Xu et al., 2003) as well as the data in this report  
14 support the existence of isoform 008a.

# Supplemental Figure 1

gcaacaagctctttctctggatccgaagggcgagagggcgctcgctctcatttggcgagggcccgagcgcgccagaccgcgaccaga  
cccggagcgtggggcccaaaggctggcgccgactccggagctcggcgccccaaccgggaagtgatcgagcagcccaccgctgacg  
ccagcgggaagtgcgagcccgggtcgagcctgctccgcccggggcgcccgggaagggggcgggcacggggcggggctggggcgggcgag

## EXON 1

gcggggccggcgggcgggggcgttggccgcaGTTGTTTTTACCCAGGCCTCGGCGCCTAGGCGCTTCGCCGAGGCTGATCTTCGTTT  
AAGTGTGAGCTGCGGCTGAGCCCAGCGCTCGAGGCGCGAGGCAGCCAGGAGGGCCCCGTGCGGCGCGGGGAGCCAGCGAGCGCGCCTTCG  
GCATTGGCCGCCGCGATGTCAGCTCAGTGCTGTGCGGGCCAGgtgagcagggcggggcgagcgcggggggtgtgagatcggagaaccg  
M S A Q C C A G Q

ggccaggagtccaggcgtggaggacctgctgggtgcgctcccagctccgcgccgaacgtagggcccggtgggtcgctcgggctggc  
...53 kb...agcagggactccagatgtgtaccacagtgcctggccatgtttcttattctatcacagtatcatgctctaagcagatgc

## EXON 2

cttctgttcttttctagCTGGCCTGCTGCTGGGTCTGCAGGCTGCTCTCTCTGCTGTGATTGCTGCCCCAGGATTCGGCAGTCCCT  
L A C C C G S A G C S L C C D C C P R I R Q S L  
CAGCACCCGCTTCATGTACGCCCTTACTTTCATTCTGGTCTGCTCCTCTGCTGCATCATGATGTCAACAACCGTGGCTCACAAGATGA  
S T R F M Y A L Y F I L V V V L C C I M M S T T V A H K M  
AAGAGCACgtaagtttgcgctgttcagctcgctcctattttccgatgtttgatgaggggtgtgtgggaaaaacatgatttagaagatgggg  
K E H  
tccatgtacccccatgtgttttggggatatacctgggttcttgaaccttctgaagcctgctctatgctttccaggatccaatgccttc

## EXON 3

...25 kb...tggtgcatgaacactccgtgacagtcacactctcactcagttgtaacagatgacttttctaaactttctcctcagAT  
I

TCCTTTTTTTGAAGATATGTGTAAAGGCATTAAAGCTGGTGACACCTGTGAGAAGCTGGTGGGATATTCTGCCGTGTATAGAGTCTGTT  
P F F E D M C K G I K A G D T C E K L V G Y S A V Y R V C  
TTGGAATGGCTTGTCTTTCTTTATCTTCTGTCTACTGACCTTGAAAATCAACAACAGCAAAGTTGTAGAGCTCATATTCACAATGGg  
F G M A C F F F I F C L L T L K I N N S K S C R A H I H N G  
taagtatttttagtcttcttggggattgctttctcctttcttattgttcaggacagtagtccaggatcccactctgccaccagacactgtg  
actgcccttcttctagttgaaattgttgatttaggggaaggtggaattgatacttaccacatggttgccctcaaaggtagaatcttatt  
tgtaacacctggtaccatgatgcgaaatttactcaagacaaagagtttatttcttgttccaagaccttccccagggtcatttccacccc  
tgcaatgaaatgggtgttttgcacaactggaggctgactgagctgctcctaattatgggaaaaagcattcttcaagtcacctagttactt  
ccccttgattaggagagaacattggccaatggcagaatcatggattgacatgctgtacettctacgaggtcctttgtccttcttgaatg

## EXON 4

tcatttaaacatatttctcctttttttttccccccacttctagCTTTTGGTCTTTTAAACTTCTGCTGTTGGGGGCCATGTGCTCAGGAG  
F W F F K L L L L G A M C S G  
CTTTCTTCAATCCAGATCAGGACACCTTTCTGAACGgtactaatggggatatttgggtatctgtttattttgtttttaccattttgtc  
A F F I P D Q D T F L N  
aaattgctcagaagcgcagtccaaagtcctctgatagttagaattactgattttcttttggcttcaaagaaattcctgacttacctg

...2 kb...gtgagtgacatttataatagtaatacatatcttatatggttgtgtgacaaatagtttaggtacactgatcatctagtaa

## EXON 5

aaattagctgtggttattctcttttgagcaaaatacaacgaaaggttgccctcattgtgttcttcatggtcttttgcagCTTGGCGCTAT  
A W R Y  
GTGGGAGCCGTCGGAGGCTTCTCTTTCATTGGCATCCAGCTCCTCCTGCTCGTGGAGTTTGCACATAAGTGAACAAGAAGTGTgtgtgt  
V G A V G G F L F I G I Q L L L L V E F A H K W N K N W  
gcctttatggaaagcttcccattgactcacagaaactgccagttttgaccaaggctgtactcaactgcattgctagggatttgcagtt

...5 kb...cttctgagcagctgggtaccagtgcctgtggcctgtagcattagttactgctgagggatgggtgactgttaccgcagaa

## EXON 6

tggtgggcttctgttgaacttgtcttctctcctctccttaccacttcccggagaaacagGACAGCAGGCACAGCCAGTAACAAGCTG  
T A G T A S N K L  
TGGTACGCCTCCCTGGCCCTGGTGACGCTCATCATGTATTCCATTGCCACTGGAGGCTTGGTTTTGATGGCAGTGTTTTATACACAGAA  
W Y A S L A L V T L I M Y S I A T G G L V L M A V F Y T Q K  
AGACAGCTGCATGGAACAAAATTCTGCTGGGAGTAAATGGAGGCCTGTGCCTGCTTATATCATTGGTAGCCATCTCACCCCTGGGTCC  
D S C M E N K I L L G V N G G L C L L I S L V A I S P W V  
AAAATCgtaagcatgtttttttccattcttctgcttacttataattttcctaagtgtctttgagcaaacccaatggctttttttgttttgtt  
Q N

...3 kb...tgaggactgtcatggggactatcaggttttttaggcattgtgctttctttttcttcaaattaaacctgttgtctgtctc

EXON 7

ttgtcacttttcag **GACAGCCACACTCGGGGCTCTTACAATCAGGGGTATAAGCTGCTATGTCACCTACCTCACCTTCTCAGCTCTGT**  
R Q P H S G L L Q S G V I S C Y V T Y L T F S A L  
**CCAGCAAACCTGCAGAAGTAG**gtaagccagcctgttagtgggcttgtgtttgcgggtgtgaatattttcattcatggaggaatgagctat  
S S K P A E V  
tgtttaaatattggagaggccttggagatagagagcagaaagatggttaccagaggctgggaaggggttgggaggagggttaggatgatt

...7 kb...gtttccagtgataagtgttactgttctaaggaggtacaccacagctacctgaattttccaaaatgagtgcttctgtg

EXON 8

cgttacaactggcctttgtacttgactgtgatgactttgttttttcttttcaag **TTCTAGATGAACATGGGAAAAATGTTACAATCTGT**  
V L D E H G K N V T I C  
**GTGCCTGACTTTGGTCAAGACCTGTACAGAGATGAAAACCTGGTGACTATACTGGGGACCAGCCTCTTAATCGGATGTATCTTGTATTCC**  
V P D F G Q D L Y R D E N L V T I L G T S L L I G C I L Y S  
**ATG**gtaagtcttgggagttactcaaggtcacttttgcagactttaaaattacaggaaaagaattgaaataactttcagtagctgtgagg  
C  
ctgcaaccatttgaggaggggggaaaataaccacaagtaaaaaggcgaagagcgtgaactcatatttgaacttcggtcaccttacttgt

...8 kb...attgctttgatttaagtctcctgaacggtaggttacattgaggctctcgtcggagcactggccagccggctttcccctt

EXON 9

cattccatgtgttgtaatgtgtaatatgccagctgacgtttttgtctgtttcttag **TTTGACATCAACAACAAGATCGAGTTCTGAC**  
L T S T T R S S S D  
**GCTCTGCAGGGGCGATACGCAGCTCCTGAATTGGAG**gtaagttcatttcttttctgtctctgcttcatctcagaagatccatttctca  
A L Q G R Y A A P E L E  
ggagggccttttgtgtttgtgtctttatcagctctgcattccgtgatcctgtttttctgtctgaggaagatttttgtatagaaaaataaa

...3 kb...ttcctgtcaccaacaccagcacacctgggaaagaacagtcacacatcttttgaagggcctgggaggtggttcaaataag

EXON 10

ggttactgttgtcttctgctgaggtggactagaaatagaacacaagccgcctgactgttgccttttgcctttcacag **ATAGCTCGCTGTTGTT**  
I A R C C  
**TTTGCTTCAGTCCTGGTGGAGAGG**gtaagcagagcgccttttattctttgcacctgtgtggcactgcagacctataactctaactctgtag  
F C F S P G G E

tctattgggattcagacacaaataacttgaatagtaaggagaaagttttattctaaagctgacttactacttatacactttttcacattc  
ttcctgaaggtatagctgagttttgtttgtgttggattctctggttagagagaaatcagtccaaattttggtttaaatgtaagttaaattata  
cagtgagatttagagaatcagagagcacatttttttaaaaaggagtgatttggaaaataccaagaggtcctgacaccttattttggggcc  
atttcattccttcaccttactttccaaggtggattggaggattccaagggcttgagaactaactctgttttactctcactttctgctg  
agcttatagtaagttttacgtcttttaagggtttttaagggttctctttctgtttaaataaatgtggcagggcaggcagcgttggcttatg  
cctgtaatcccagcacttcgggaggtgaggtgggtggatcacctgaggtcaggagttcgagaccagcctggccaacatggcaaaaccc  
tgtctctactaaaaaacaatacaaaattagccgggctggtggcgtgtgctgtaatcccagctacttgggaggtgagggcaggagaat  
cgcttgaacctgggaggtggaggttgcagtgaccaagatcatgccactgtactccagccggggcaaaaagagtgaaactccatctcaa  
aaaataaataaataaataaataatgtggcattaggttaactcttctgttacggaagttgctaggggtggagtggggggttttgtgcttaggg  
cacagattgaagttgccagaggggtacagatggcctttctggcatcttttctactgacagccctgtagaattagcgagcgtgactttgctg

EXON 11a (green)

aatggtaaacacacacattcactcattgagcctgggctccctctgtgcttcacag **ACACTGAAGAGCAGCAGCCGGGGAAGGAGGGACC**  
(common F primer) D T E E Q Q P G K E G P  
**ACGGGTCATTTATGACGAGAAGAAAGGCACCGTCTACATCTACTCTACTTCCACTTCGTGTTCTTCTAGCTTCCCTGTATGTGATGA**  
R V I Y D E K K G T V Y I Y S Y F H F V F F L A S L Y V M

EXON 11b (201 transcript - the non-gray "tg" sequence is not present in the putative 201 isoform transcript)

**TGACCGTCACCAACTGGTTCAA**gtgagtgggccatttgccttaggtatttttgaagcaaagccttaaagtttaagagtttaagtactgttgc  
W F K S G P F (putative 201 isoform)  
M T V T N W F K (last exonic a.a. is N in isoform 001)  
tgtttgtttgtttgagaaggagctcactctgttgcaggctggagtgagtgagcagcagcctggctcactgcaacctctgcttccca  
ggttcaagcgattcttgtgcctcagcctcccagtagctgggattacatgcatgtaccaccatgcctagctaatttttatatttttagt  
tgagacgggggttttggcatgttggccaggctggcttgaactcctgacctcaagtgatccacctgccttggcctctcaaagtgctggga  
ttacaagcgagttctgagttttaacagtggtatggttttaacctggaaactggtgatgcttatggcaactttaagaaaatggaa  
agttagctctatatggacagctctggaaaacatggtaatgaaggaaaaataggaactcctaagcattcatctgcctttcagaaagagaaa  
atatcccttttttttctacttcaaattttgtgtatctttttccccatttttcttcattttcttatacaaaaattggaaacatctttttt  
aaaatacaaaactaaatgtggaattatgaaaagtaacaatgtgggtaccccccgctctacttccccacacagataaccactgctagga  
tgtgtatccttctccttttctgtgcatttataaacctctgtagttttttttgttttttagttggagcttctgctttgtcaccaggctgg  
agtgagtgggcgcaatctcggctcactgcaacctccgcccctgggttcaagtgattctcctgcctcagccttttgagtagctgggatta  
caggtgctgccaccacactggcctaatttttttttttatttttttagtagagacggagtttccacatattggctaggctggctcgaac

tcctgaccttgtgatccacctgcctcagcctcccaaagtgctgagattatagccatgatccaccatgtccagctaatttttttttaac  
ataaatgtcattatacatgttttccctggaggcttttttttttttaacttggcagtagacatgattgacctggccttccctggcactaca  
cagaggttcatactttttctacaggtccacagctttgggtgtatcataatttttttgaccactaagttaagcttagacatgtaggctca  
ttgtgcttcccttttatcattcattcaacagatgtgcaagtggctcctatgtgccacacgggttctatgagggcaggatttatagtccagca  
ggagagacagactatgacgcaagtcaaataatgggtgtgtagatgggtgatgagatttggggagaaaaataaaattaggagaggggaattgg  
ggtaggggtggtgggagtggtggtttcaagcacagtgattggagagattcttccctgaaggaggagaggagaagggagctttaatgcttc  
ccagtgatgctttgggaactcctgggaatttttggcttggaaagcttaagaaaagatggagaaggctataattaaaaagggcagataata  
acaaatgtcgaggaagtggagaaattggaaccctcttacattgctggtttgaatgtgaaatctgctttggaaaagagtttggcatctcc  
ttaaacaattaaacattgagttacaatgtaatccagctcttccactactcctgagcgtatacctaagacaaaaagaaaacttaggtccac  
aaaacttacacagcgggtgttcatacaagcatcattggtgataatcaaaaaggggaaacatcccaaatgaccatcagctggtgactgcct  
aaacaaaatgtgctctatccatacaataagatactattttagcagtaaaaaggaatgaaggactgacacatgctgcccgtggtgagcc  
ttggaaattgtatgccaggcaaaaaagccacacacaagagaccatgtgattccttttatatcaactgtccagaataggcaaattcatag  
aggcagaaaagtagattgggtgaatgccccgggtgggctgagggggccatggggaaggggagagcacctaaggggtgcatgatttcttttg  
ggggtgatgagaatgtttggaaatgggtagtgttgatggttagcacaagctctgtgatgaatacattgaaagccgttgaattatacatta

EXON 12

taaatggatgtgaattagtgaattgtatctcaatatattcctgctttgaccgaggctaggtgtcttgtttccacagCTACGAAAGTGCC  
(001 R primer) Y E S A

AACATCGAGAGCTTCTTCAGCGGGAGCTGGTCCATCTTCTGGGTCAAGATGGCCTCCTGCTGGATATGCGTGCTGTTGTACCTGTGTAC  
N I E S F F S G S W S I F W V K M A S C W I C V L L Y L C T  
GCTGGTCGCTCCCCTCTGCTGCCCCACCCGGGAGTTCTCTGTGTGATGATATCGGCGGTCCCCTGGGCTTTGTGGGCCTACAGCCTGGA  
L V A P L C C P T R E F S V \*

AAGTGCCATCTTTTGAACAGTGTCCCCGGGGCAGGGACTGGCGCCCTGTGCCTGAGTGGGTCTGAAAAAGCTTTGAGAGAGAAAAAAA  
AAATCTCCTGATTAGCTTTTTACTTTTTGAAATTCAAAAAGAACTACCAGTTTGTCCAAAGGAATTGAAATTTTCAACCAAAGTATC  
ATGGTTGAAATATCTTACCCCTAGGAAGTGGATACCAGTTATGTTGACTTCTTCTGCATGTTTTTGC AAAACAGAATTTGGGGCACA  
GCATCTTTTACAGGGATAAAAAATATCTTGTGGGGCCAGTCATTCTCATCCTCGGAATAGAAAAACATGCCAAAATCTTGAGTCCCAG  
CGCCTAACAGAATCCAGACCCCTCTCACTCACTTCCGCCTCTTAGAGCCTTGTCCCCAGGGGGCTTTGAGGACAGGACTCAGCCTGCAG  
GGCCCTGGTATTTATAGGGTCCAAGAGGAGGCACCTGCTTTTCAACTGCACCCTCAGTGCTGCCTCTTACGGCCCTAAACGTTTCC  
CTTTGAGGTTGTGATGCTGGGAATCACAGACTTCACTCTCTGCCTGCACCCTTCCCCGAGGTCTCATCTTTTCTGGGTCCCACATCTTT  
GTAATAATGTGAAAAAGCACAATTTGTCTGATCACCCCCAGGTGGTTCCCCACCTTATTATCACTACCTGATCCGAGTTACTGCAATA  
AGTACGGCGCTTATTTATGGTATTATTCACATGATTATAGAACAAGATTGTTTTCTCTGCCTAAGCAATGGAGGGCTATCATTCTT  
ACTTGTTTGTGCTGTTGATAATGATAATACTTTTAGGACCTTAACGAAAAGCTGCTTCGTGTTGAAGCTGCTGCATGCATGCCTCTT  
TCAGTTGTTGAGGTCAGCCCTCAGTTTTTTTCTCCACCTTGAGCCCTTGAAGCTGTA AAAAGCGGAAGTCGTTTTGTGTTCTGGATCTG  
TAACGTGACCATAACCGTTCAGGTTTATGCTGGCATCCTTGAGTAGGTTTGTCTAATGTGAGAATTTCTGAGGTGAGGACTCTCAGACACA  
CTGACCAGAAGAAGCTTGTAGGCAATGTGTGGAAGTGCCGAATATACTTAAAAAGAGGTGCGCAGAGGCAGGCGGATCACTTGAGGT  
CAGGAGTTGCAAGACCAGCCTGGCTAACATGGTGAAACCCTGTCTCTATTA AAAATAGAAAAATTAGCCGGGCATGGTAGCGTGTGCCT  
GTAATGCCAGCTACTCGAAGGCTGAGGCATGAGAATCACTTGAACCCGGGAGGCGGAGGTTGCAGTGAGCCGAGATCACGCTGCACAGG  
AATTTCCAAAATACGTACTTGCAAAGTAATACAGAAACGTGACTTTCGGCAGCTACCCAAGATGATGCCTATTTTTCAGTGTGATGAT  
TCAGGCAGGAAAAGGTTTACTTGGTGAAACTCCTGTTAGAATTTCACTCGGGGTGGAAGAATCTTCTCGAGCTCTCTGTAAGTGAG  
GATCTAAGAATAAAAAGGCTCAGCCTAGTCATTTTTTTCTGTGCCCTACTGTATGAGTTGGGCAGAATTGAGTGCCACCTAAGCTGGGCT  
TCTGTGTGCCAAAATGCTGGTGGGTGAAATTAGTGAAATTTCTTCTATTCACTTCTTGGCCCTTCTCCAAGAAAACCCATGGGGAAC  
AAATTACAGGGGATGAATTCCTTTAGAACTTTCCCTACTTAGAGTGTGTTGAGATTGAGTTTCAAAGGCCTCCATCTGTGTGTGTTGGT  
TTAGAGAGCCTTGTGTTGTAATTCATTAAATTTCTTTTTTAGGGCAGGAGCTCTGTA CTGACTCAGCAGTTAAAAGATTGATCTGGAGTC  
GCAAAAATGAAAAGCCGTGTTCTAACCTGAGGAATCAGTTAGGGGACAGGAGTTCCGTGGGCCAGGAATGGGCTCAGGGAGTGGGGCTGC  
GTGTCACACACAGTAGCTGTGTTGCAGTGGCCTAGGGCCTTGGGGGTTGTCTTTAGGAAACACCCTGAGGGGAAGCAGGTAAGAGCCT  
GGGCAGTATTGTGACTAGTTTCACTGTTTTCTCCTGCTGAGGTCTAGCAGAGCCCTTGCTTTGTCTCTCGGCTGGGTCTGGCTGCCA  
GCTGGTGTGATTTGAGAAACTGACCTTACGCGCAGTCAAGGTCCAGCTGACAAGGCCTTGATTCCTTGGCTGGCCGTGATTGGCCCTT  
TCCTCTGCAGAAAGCAGCTTAGGGAAGCCCAAGCAAGGGAGTGTGGCCGGTAGAAGGCCCTCGTCGCTTCCTTCTGGAGCCAGCCCAGC  
CACACAACGTTTTCCAGATGCGTGAGTCTGGTTTGTGACATCCCGTTCCCTTCTGCCGTTGGTCTGATGCAAGAGGAAGAGTTACAGT  
TGCTCTGAATTTTATCTCAGCTGAAAATGTTAGCACGTGTATCTGGATGAACAAAACAGATGTGGATGTATCTGAGGATGAGGAGCT  
ATCAATGCAGAGTTAATGTTAATGGTTAATAATTGTGATATAACAATACTCAGGTGAGGAGTCAACATTCCTGGATTTAAAGAATCTACA  
GTTTTGTGCAATTTGATTTGAGAAACTGAAACATTTGTGCCAATGGCTTTGAGTTCCTATAACAACGGTGTAAATTTGATTA ACTCAC  
TGATATCTTTTAAAAATAATAGACATTTGCTTCTACACCTTTTTGTACATGACCTAAAGAGTATATTCCAGAAGCTGCTGGTCAGAC  
ACATTTAGGGATGACAGTTGAAGAGGACTTTTTTAAAGCTGCATGTGAATATTTCTCTGTGTGATTTGTCTGATGTAGAAAAGTTTTT  
CCCTCATTTTTATGAGTAAAAACACTAAGTGGGTGGCAGGGGGGTGGGGGTTCTTATGGGAGTGTACATACCGCGGCATGTTACCTGACT  
GGAGACTAGAGACTATTTCCATTATAAGCCTTCAGAAACCAACCACGTCTTTACTGTGTCTAGCTTTTTAAATACTGATTGGTTAGTT  
TTATTTTTGCCCACAGTTTCTTGGGCAAAAAGGTTCTTCATTTTGTCTGAAAAAGAAATTTTGGCAGAGGTTTGGAGCCTCTTTG  
AAGGGGAGATAGAGTGGGGGTGGGTTGTGGGGAGGGTGGAGTTATTGGGGTTTTGGGGTCTGTTTTCCATACAACATTGTTTATTTCCG  
ATTCCTCAGAAGATCCTTTATTATGAATAACCTCAGTGAATGTTAATTTCTGTCCCCATGTCAAATTTGTCACCCTAAGCCTTTTTT  
TTTTTTTTTTTTTTTTTTTTTTTTGGAGACGGGCTCACTCTGTGACCCACGCTGGAGTGCAGTGACATGATCTTGACTCATGGCAGGCTTGA  
CCTCCTGGGCTCAAGGACCACCTCCCAAGTAGCTGAGACCACAGTTTTGCCCCATCACACCTGGCCGATTTTTTATTTTTTTGTAGAGAT  
GGGGTGTCCAGGCTGGTCTCAAACCTCTGAGCTCAAGCAATGTGCCCGCCTTGCTTCCCAAAGTGTGGGATTATAGGCGTAAACCA
